# Supplementary material for: Integrating Telehealth Care-Generated Data With the Family Practice Electronic Medical Record: Qualitative Exploration of the Views of Primary Care Staff
Source: PubMed Central journal article supplement (PMC3869047; doi:10.2196/ijmr.2820), 2013-11-26
Supplement: ijmr_v2i2e29_app1.pdf [file ijmr_v2i2e29_app1.pdf]

## Appendix 1 Description and screenshots from EMIS/Philips software system

This pilot software was developed the UK Department of Health as a proof of concept project focussing on integration of telehealth accrued data with Primary care electronic medical records. In this case, telehealth data from the Philips Motiva telehealth technology was integrated into general practice electronic health records held in EMIS web. The standards basis of this demonstrator solution means that the specifications and supporting rules are openly shareable across the clinical ICT industry and are not the exclusive intellectual property of Philips or EMIS. The specifications are compliant with the standards proposed by the Continua Health Alliance, Integrating the Healthcare Enterprise (IHE®) and implemented by NHS England's National Programme for IT and work is being undertaken by all these organisations to increase the adoption of these standards across global healthcare.

Incoming telehealth reports.

Report opened to view

| Due Date                                     | Patient Name          | Task                                     | Details                                                   | Action               |
|----------------------------------------------|-----------------------|------------------------------------------|-----------------------------------------------------------|----------------------|
| <b>Medicine Management - 4 Overdue / Due</b> |                       |                                          |                                                           |                      |
| 07-Jul-2009                                  | BRIGGS, James (Mr)    | ETP Awaiting Signing                     | ETP Prescription Request                                  | <a href="#">Open</a> |
| 07-Jul-2009                                  | GARDNER, John (Mr)    | Prescription Request                     | ETP Prescription Request                                  | <a href="#">Open</a> |
| 07-Jul-2009                                  | SUTTON, Steven (Mr)   | Prescription Request With Queries        | ETP Prescription Request                                  | <a href="#">Open</a> |
| 07-Jul-2009                                  |                       | ETP Nominations Unmatched Patient        | ETP Prescription Request                                  | <a href="#">Open</a> |
| <b>GP2GP - 3 Overdue / Due</b>               |                       |                                          |                                                           |                      |
| 02-Sep-2009                                  | ECHO, Alfie (Mr)      | GP2GP - Medication Awaiting Authorisa... | GP2GP Medication awaiting authorisation                   | <a href="#">Open</a> |
| 04-Sep-2009                                  | JANE, Richards (Dr)   | GP2GP - Unfiled                          | GP2GP Records to be filed                                 | <a href="#">Open</a> |
| 04-Sep-2009                                  | ECHO, Janet (Mrs)     | GP2GP - Unfiled                          | GP2GP Records to be filed                                 | <a href="#">Open</a> |
| <b>Inbound Documents - 13 Overdue / Due</b>  |                       |                                          |                                                           |                      |
| 27-Jul-2009                                  | READ, Emma (Miss)     | Inbound Documents - Awaiting Coding      | Coding Diagnostic Report from Choose & Book Service a...  | <a href="#">Open</a> |
| 08-Sep-2009                                  | BOND, Gary (Mr)       | Inbound Documents - Awaiting Coding      | Coding Diagnostic Report from Cardiology Quick access ... | <a href="#">Open</a> |
| 28-Oct-2009                                  | BIRCH, Brian (Mr)     | Inbound Documents - Awaiting Filing      | Confidentiality Policies Overridden                       | <a href="#">Open</a> |
| 12-Dec-2009                                  | NORTH, Steven (MR.)   | Inbound Documents - Awaiting Filing      | Personal Health Monitoring Report - Routine Scheduled     | <a href="#">Open</a> |
| 12-Dec-2009                                  | HOPKINS, Pauline (Ms) | Inbound Documents - Awaiting Filing      | Personal Health Monitoring Report - Routine Scheduled     | <a href="#">Open</a> |
| 12-Dec-2009                                  | HOPKINS, Stephen (Mr) | Inbound Documents - Awaiting Filing      | Personal Health Monitoring Report - Routine Scheduled     | <a href="#">Open</a> |
| 12-Dec-2009                                  | BATES, Philp (Mr)     | Inbound Documents - Awaiting Filing      | Personal Health Monitoring Report - Routine Scheduled     | <a href="#">Open</a> |
| 12-Dec-2009                                  | WILLIS, Gary (Mr)     | Inbound Documents - Awaiting Filing      | Personal Health Monitoring Report - Routine Scheduled     | <a href="#">Open</a> |
| 12-Dec-2009                                  | NORTH, Steven (MR.)   | Inbound Documents - Awaiting Filing      | Personal Health Monitoring Report - For Information Only  | <a href="#">Open</a> |

Report including graphical data

# Graphical View of Data in Patient Record

File Document

This task is owned by : NORTH, Steven (MR.) Born: 17-Oct-1950 (59y) Gender: Male NHS: 987 322 7816 Usual GP: BURNS, Robert (Dr) Active Patient

Document Type Attachment Letter Date 09-Dec-2009 Source Document Title Telehealth Report (06-Nov-2009)

**Personal Health Monitoring Report - Action Required** Raw View

**Author** Philips Administrator  
**Organisation** NEWHAM PCT

**Reason For Out Of Tolerance**  
 Dr Davies - Although patient has experienced a number of unexplained low glucose values over the past week, in discussions with patient there appears to be no reason for this trend and patient has stated full compliance with the agreed care pathway. I have issued further diabetic information to the patient in the form of on screen information and educational videos and will continue to monitor closely. The patient informed me that she is due to visit your surgery for a routine check up in the next week. I thought it would be useful for you to be aware of the trend during your consultation.  
 I would value your opinion on whether this appears to be a compliance issue or whether it may be related to some form of other condition.  
 Sincerely,  
 Helen Mariott

**Body weight** Code History

| Abnormal                 | Date        | Value   | Threshold | Comments |
|--------------------------|-------------|---------|-----------|----------|
| <input type="checkbox"/> | 30-Sep-2009 | 89.0 kg | 80 - 88   |          |
| <input type="checkbox"/> | 29-Sep-2009 | 89.2 kg | 80 - 88   |          |
| <input type="checkbox"/> | 27-Sep-2009 | 87.1 kg | 80 - 88   |          |
| <input type="checkbox"/> | 26-Sep-2009 | 89.2 kg | 80 - 88   |          |
| <input type="checkbox"/> | 25-Sep-2009 | 90.2 kg | 80 - 88   |          |
| <input type="checkbox"/> | 24-Sep-2009 | 90.5 kg | 80 - 88   |          |
| <input type="checkbox"/> | 21-Sep-2009 | 89.6 kg | 80 - 88   |          |
| <input type="checkbox"/> | 20-Sep-2009 | 88.6 kg | 80 - 88   |          |
| <input type="checkbox"/> | 19-Sep-2009 | 89.6 kg | 80 - 88   |          |

Code History

**O/E - weight**  
 88 kg  
 Read Code 22A  
 SNOMED-CT 253677014

| Date        | Value   |
|-------------|---------|
| 08-Nov-2009 | 88 kg   |
| 05-Nov-2009 | 78 kg   |
| 04-Nov-2009 | 89 kg   |
| 04-Nov-2009 | 89 kg   |
| 04-Jun-2008 | 85.4 Kg |
| 24-Sep-2007 | 93.1 Kg |
| 28-Aug-2007 | 91.5 Kg |
| 15-Aug-2007 | 92 Kg   |
| 03-Jul-2007 | 93.0 Kg |

10 of 10 Create non urgent Coding Task for BURNS, Rob... Mark as Viewed Close
