# Supplementary material for: Integrating Telehealth Care-Generated Data With the Family Practice Electronic Medical Record: Qualitative Exploration of the Views of Primary Care Staff
Source: PubMed Central journal article supplement (PMC3869047; doi:10.2196/ijmr.2820), 2013-11-26
Supplement: ijmr_v2i2e29_app2.pdf [file ijmr_v2i2e29_app2.pdf]

## Appendix 2 Topic Guide

| Main topic                    | Possible issues for exploration                                                                                                                                                                                                                                                                                                                                                                                                                                                                                                                                                                                                                                                                                                                                                                                         |
|-------------------------------|-------------------------------------------------------------------------------------------------------------------------------------------------------------------------------------------------------------------------------------------------------------------------------------------------------------------------------------------------------------------------------------------------------------------------------------------------------------------------------------------------------------------------------------------------------------------------------------------------------------------------------------------------------------------------------------------------------------------------------------------------------------------------------------------------------------------------|
| Demonstrate integrated system | <ul style="list-style-type: none"> <li>answer and discuss any questions which arise from the demonstration</li> </ul>                                                                                                                                                                                                                                                                                                                                                                                                                                                                                                                                                                                                                                                                                                   |
| Familiarity                   | <ul style="list-style-type: none"> <li>what systems are they currently working with for patient records and for receiving pathology/radiology results</li> <li>have they experience in working with patient acquired data in this practice or elsewhere</li> </ul>                                                                                                                                                                                                                                                                                                                                                                                                                                                                                                                                                      |
| Advantage                     | <ul style="list-style-type: none"> <li>does the software offer a relative advantage (over the current standalone system)</li> <li>what benefits are readily apparent</li> <li>does it appear simple to use</li> <li>do they think the software offers the opportunity to experiment with how it's used</li> <li>what other advantages are apparent</li> </ul>                                                                                                                                                                                                                                                                                                                                                                                                                                                           |
| Disadvantages                 | <ul style="list-style-type: none"> <li>what are the apparent disadvantages of the system</li> <li>what are the risks perceived in implementing this software</li> <li>what are the medico-legal issues in implementing this software</li> <li>what other concerns would they have about this system</li> </ul>                                                                                                                                                                                                                                                                                                                                                                                                                                                                                                          |
| System design                 | <ul style="list-style-type: none"> <li>would it be preferable to have the patient recorded data added to their medical records (as in this system) or to have patient details on the Telehealth website- explore medico-legal aspects of these options</li> <li>how frequently would they like the data to be uploaded</li> <li>what kind of data and what detail of data would they like e.g. every value, an average, or a summary sheet (what would be required in a summary)</li> <li>is numerical or graphical data preferable</li> <li>would they want alerted of abnormal/especially high risk values</li> <li>what data quality aspects are important to them</li> <li>Do they have concerns of speed of access of information</li> <li>what other aspects of the design would they prefer or change</li> </ul> |
| Compatibility                 | <ul style="list-style-type: none"> <li>how relevant is the system to the practice staff</li> <li>how compatible is the software with the values, norms and perceived needs of the practice staff</li> <li>how likely would they be to adopt using this system</li> <li>how malleable is the system in terms of allowing users to adapt and refine to their own needs and circumstances</li> <li>how might this system affect their delivery of care and their consultation/communication</li> <li>would it be useful to have this information more at hand when consulting with patients – are there any drawbacks</li> </ul>                                                                                                                                                                                           |

|                      |                                                                                                                                                                                                                  |
|----------------------|------------------------------------------------------------------------------------------------------------------------------------------------------------------------------------------------------------------|
|                      | <p>to having it more accessible (patient expectations)</p> <ul style="list-style-type: none"> <li>• how might this system affect their work schedule/ work load both within and out with consultation</li> </ul> |
| Service agreements   | <ul style="list-style-type: none"> <li>• what items would be important for them to include in service agreements e.g. data limits, alerts, processes for follow up, tracking of data</li> </ul>                  |
| Training and support | <ul style="list-style-type: none"> <li>• what training would be required to adopt such a system</li> <li>• what range of support would be required to help with the adoption of the software</li> </ul>          |
| Confidentiality      | <ul style="list-style-type: none"> <li>• what concerns might there be of the confidentiality of data</li> </ul>                                                                                                  |
| Recommendations      | <ul style="list-style-type: none"> <li>• what recommendations do they have for the system</li> </ul>                                                                                                             |
