# Supplementary material for: Integrating Telehealth Care-Generated Data With the Family Practice Electronic Medical Record: Qualitative Exploration of the Views of Primary Care Staff
Source: PubMed Central journal article supplement (PMC3869047; doi:10.2196/ijmr.2820), 2013-11-26
Supplement: ijmr_v2i2e29_app3.pdf [file ijmr_v2i2e29_app3.pdf]

### Appendix 3 Participant characteristics

| <i>Interview number</i> | <i>Profession</i> | <i>Telehealth experience</i>          | <i>Gender</i> |
|-------------------------|-------------------|---------------------------------------|---------------|
| 1                       | FP                | No (had in practice but not involved) | F             |
| 2                       | FP                | No                                    | F             |
| 3                       | FP                | No (had in practice but not involved) | F             |
| 4                       | PT                | Yes                                   | F             |
| 5                       | FP                | No                                    | M             |
| 6                       | PT                | Yes                                   | F             |
| 7                       | FP                | Yes                                   | M             |
| 8                       | PN                | Yes                                   | F             |
| 9                       | PN                | Yes                                   | F             |
| 10                      | FP                | Yes                                   | M             |
| 11                      | PN                | No                                    | F             |
| 12                      | FP                | No                                    | F             |
| 13                      | FP                | No                                    | F             |
| 14                      | PN                | Yes                                   | F             |
| 15                      | PN                | Yes                                   | F             |
| 16                      | FP                | Yes                                   | F             |
| 17                      | FP                | No                                    | F             |
| 18                      | PN                | Yes                                   | F             |
| 19                      | PN                | No                                    | F             |
| 20                      | PN                | No                                    | F             |

*FP family clinician, PN practice nurse, PT Physical Therapist*
